# Supplementary material
Source: PubMed Central journal article supplement (PMC3571618)
Supplement: NIHMS429303-supplement-Supplementary_Methods.pdf [file NIHMS429303-supplement-Supplementary_Methods.pdf]

## Supplemental Methods

### *Cell counting for survival and GFP-transfection with FACS machine*

If not mentioned specifically, all quantitative experiments were performed on 12-well plates. For each condition, three biological repeat experiments were performed. In order to get the input cell number at 0 hour, three 50 $\mu$ l cell suspensions for harvest condition and suspension were added into 0.5ml of 0.5% Trypsin/EDTA (or TrypLE) in a FACS tube, and were incubated at 37°C for 5 minutes, before 0.5ml 10% FBS in DMEM were added. Right before FACS, propidium iodide (1  $\mu$ g/ml for final concentration) and 5000 countbright beads were added into the cells. The formula for the cell counting practice was: cell number = (5000 x counted cell number)/counted beads. 200-500 beads were usually counted for each sample.

At specific time points, cells were dissociated with 0.5ml of 0.5% Trypsin/EDTA or TrypLE at 37°C for 5 minutes, then were neutralized with 0.5ml 10% FBS in DMEM and counted along with 1  $\mu$ g/ml propidium iodide and 5,000 countbright beads on FACS machine. GFP positive cells were scored in FITC channel.
