# Supplementary material
Source: PubMed Central journal article supplement (PMC3571618)
Supplement: NIHMS429303-supplement-Table_S1.pdf [file NIHMS429303-supplement-Table_S1.pdf]

## Examples of cell lines passaged with EDTA without drug treatments

| Cell Lines              | Experiments | Passage number       | Karyotypes |
|-------------------------|-------------|----------------------|------------|
| H1(WA01)                | >10         | Usually ~25 passages | Normal     |
| H14 (WA14)              | 1           | 46                   | Normal     |
| iPSC-imr90-clone 1      | 1           | 51                   | Normal     |
| iPSC-imr90-clone 4      | 1           | 20                   | Normal     |
| iPSC-Foreskin clone 6.1 | 1           | 20                   | Normal     |
| iPSC-DF19-9-7           | 1           | 29                   | Normal     |
| iPSC-ND1-clone 4        | 1           | 22                   | Normal     |
| iPSC-ND2-clone O        | 2           | 27                   | Normal     |
